# Supplementary figures and images for: Persistence in Treatment for One Year Among Patients in Nigeria With First-Episode Schizophrenia
Source: Atypon-hosted journal article supplement (doi:10.1176/appi.ps.201300294), 2014-09-01

### Survival Function

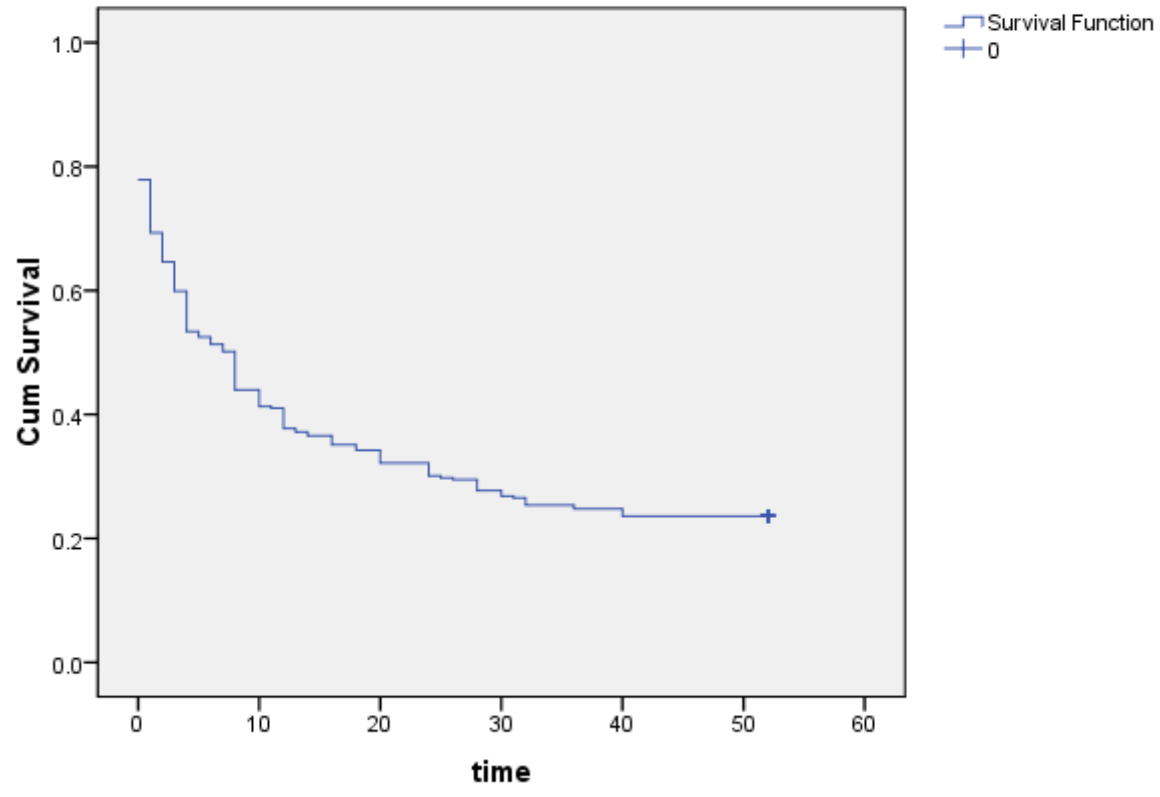

Time (T) in weeks

Time (t) in weeks

Supplement: 1174_ds001.pdf [file 1174_ds001.pdf]
